# Supplementary material
Source: Springer Nature journal article supplement (https://www.springermedizin.de/resource/supplementary/12874_2014_1082_MOESM3_ESM.pdf/9433488)
Supplement: MOESM3 [file 9433488]

## INTERVENTION TYPES

## SHORT TERM OUTCOMES

## MODERATING AND

## DEMAND MANAGEMENT

## IMPACT

### GP EDUCATION

#### PEER REVIEW / FEEDBACK

Guidelines + training  
Issuing of guidelines  
GP training

### PROCESS CHANGE

#### SPECIALIST CONSULTATION PRIOR TO REFERRAL ELECTRONIC REFERRAL

Designated appt slots / fast track clinic  
Direct access to screening  
Decision support tool  
Waiting list review / watchful waiting

### SYSTEM CHANGE

#### COMMUNITY PROVISION OF SPECIALIST SERVICES BY GPs

#### OUTREACH: COMMUNITY PROVISION BY SPECIALISTS

Return of inappropriate referrals.  
Payment system  
Referral management centre / triage system  
ADDITIONAL PRIMARY CARE STAFF  
SYSTEM OF GATEKEEPING

### PATIENT INTERVENTION

Health information/education  
Patient concerns/ satisfaction

### GP KNOWLEDGE

Knowledge of patient responsiveness to treatment / suitability  
Knowledge of services/systems  
Training in condition  
Use or awareness of referral guidelines  
Use or awareness of quality indicators

### GP ATTITUDES/BELIEFS

CONFIDENCE IN MANAGEMENT  
TOLERANCE OF UNCERTAINTY/RISK  
BELIEF REGARDING PEER OPINION  
PERCEPTION OF ROLE  
VIEWS OF SPECIALIST SERVICE

### GP REFERRAL BEHAVIOUR

OPTIMAL CONTENT OF REFERRAL  
Optimal timing of referral  
Use of pre-referral testing

### DOCTOR-PATIENT INTERACTION

OPTIMAL RELATIONSHIP  
SHARED DECISION-MAKING  
APPROPRIATE RESPONSE TO PATIENT PRESSURE

### PATIENT KNOWLEDGE

Patient knowledge

### PATIENT ATTITUDES/BELIEFS

PATIENT WISHES / PATIENT PRESSURE  
APPROPRIATE SERVICE USAGE

## MEDIATING FACTORS

### GP FACTORS

PREVIOUS EXPERIENCE OR FAMILIARITY WITH SERVICE  
SATISFACTION WITH SPECIALISTS  
EMOTIONAL RESPONSE TO PATIENT  
Years in practice  
Age  
Ethnicity/country trained  
Gender  
Awareness of own referral rate

### PATIENT FACTORS

CO-MORBIDITY/COMPLEXITY OF CONDITION  
SUITABILITY FOR REFERRAL/LIKELY BENEFIT  
CLINICAL SPECIALITY/CONDITION  
SOCIAL FACTORS  
Ethnicity  
Age  
Gender  
Level of education  
Self-reported health

### SERVICE FACTORS

GP BURDEN/TIME PRESSURE  
PERCEIVED WAITING TIME  
AVAILABILITY OF SPECIALIST  
Location of service (rural/urban, local/far)  
Size  
Fundholding/ownership

## OUTCOMES

ADEQUATE INFORMATION PROVIDED BY REFERRER

WAITING TIME

Appropriate actioning of referral

REFERRER SATISFACTION

PATIENT SATISFACTION

Cost

Referral rate

Attendance rate

Appropriateness/ adequacy of referral (urgency / timing)

Appropriateness/ accuracy of referral (place / person)

Note: the arrows indicate the direction of the pathway and do not imply causality

STRONGER EVIDENCE (capital and underlined)  
STRONG EVIDENCE IN OPPOSING DIRECTIONS (capital)  
Weaker evidence (lower case and underlined)  
Conflicting evidence (lower case and no underline)  
A single study providing evidence (lighter shade)
